# Supplementary material for: New insights into the di-n-propylamine (DPA) molecule as an organic structural directing agent (OSDA) in the crystallization of AlPO4-11 molecular sieve
Source: Royal Society of Chemistry journal article supplement (doi:10.1039/c8qi00346g), 2018-01-01
Supplement: c8qi00346g1.pdf [file c8qi00346g1.pdf]

## New Insights of Di-*n*-propylamine (DPA) Molecule as an Organic Structural Directing Agent (OSDA) in the Crystallization of AlPO<sub>4</sub>-11 Molecular Sieve

Na Sheng,<sup>a</sup> Yueying Chu,<sup>b</sup> Shaohui Xin,<sup>b</sup> Qiang Wang,<sup>b</sup> Xiaolong Liu,<sup>b</sup> Jun Xu,<sup>b</sup> Feng-Shou Xiao,<sup>\*a</sup> and Feng Deng<sup>\*b</sup>

<sup>a</sup> Department of Chemistry, Zhejiang University, Hangzhou 310028, China.

<sup>b</sup> State Key Laboratory of Magnetic Resonance and Atomic and Molecular Physics, Wuhan Institute of Physics and Mathematics, the Chinese Academy of Sciences, Wuhan 430071, China.

**Characterization.** The <sup>31</sup>P-<sup>27</sup>Al} PT-J-HMQC MAS NMR experiments were performed on an 11.7 T Bruker AVANCE-III spectrometer using commercial 4 mm outer diameter rotors at the spinning frequency of 12.5 kHz, tuning and matching to <sup>1</sup>H, <sup>31</sup>P and <sup>27</sup>Al Larmor frequencies (500.6 MHz, 202.6 MHz and 130.5 MHz, respectively). An initial <sup>1</sup>H-<sup>31</sup>P CP transfer was used with a contact time of 3 ms and rf-field of  $\nu_{31P, CP} = 43.03$  kHz and  $\nu_{1H, CP} = 55.68$  kHz. The <sup>31</sup>P-<sup>27</sup>Al} PT-J-HMQC pulse sequence with CT selective  $\pi/2$  pulses and  $\pi$  pulses were employed on <sup>27</sup>Al and <sup>31</sup>P channels with  $\tau_{\pi/2, 27Al} = \tau_{\pi, 27Al}/2 = 8.5$  us and  $\tau_{\pi/2, 31P} = \tau_{\pi, 31P}/2 = 4.5$  us, respectively. Continuous-wave proton decoupling with amplitude of 70.42 kHz was used at the end of CP transfer. The Population transfer enhancement of between <sup>31</sup>P and <sup>27</sup>Al was achieved with a sideband-selective (SS) WURST-80 irradiation on <sup>27</sup>Al with a length of 75 us that used a sweep frequency range of  $\nu_R$ . The values for peak RF amplitude and offset of WURST-80 were optimized with respect to the different samples: ( $\nu_1^{max}$ ,

$\nu_{offset}$ ) = (10, 170) kHz on  $^{27}\text{Al}$  channel. 30  $t_1$  increments of 80  $\mu\text{s}$  were acquired in the first dimension and a total of 1000 scans were accumulated with a recycle time of 1.5 s.

The 2D  $^{31}\text{P}$ - $^{31}\text{P}$  DQ-SQ MAS NMR experiments were performed on an 9.4 T Bruker AVANCE-III spectrometer using commercial 4 mm outer diameter rotors at the spinning frequency of 10 kHz, tuning and matching to  $^1\text{H}$ ,  $^{31}\text{P}$  Larmor frequencies (399.3 MHz and 161.6 MHz, respectively).  $^1\text{H}$ - $^{31}\text{P}$  CP experiments with a contact time of 4 ms and rf-field of  $\nu_{^{31}\text{P}, \text{CP}} = 86.27$  kHz and  $\nu_{^1\text{H}, \text{CP}} = 55.93$  kHz was employed to prepare the initial  $^{31}\text{P}$  signal. RFDR homonuclear recoupling was used on the  $^{31}\text{P}$  channel with  $\nu_{\text{nut}, ^{31}\text{P}} = 20.83$  kHz. continuous-wave  $^1\text{H}$  decoupling with an amplitude of 67.02 kHz was used at the end of CP transfer, while a TPPM proton decoupling with an amplitude of 44.66 kHz was used during acquisition. The increment in the indirect dimension ( $t_1$ ) was set to 100  $\mu\text{s}$ , and 2048 scans were acquired for each  $t_1$  increment.

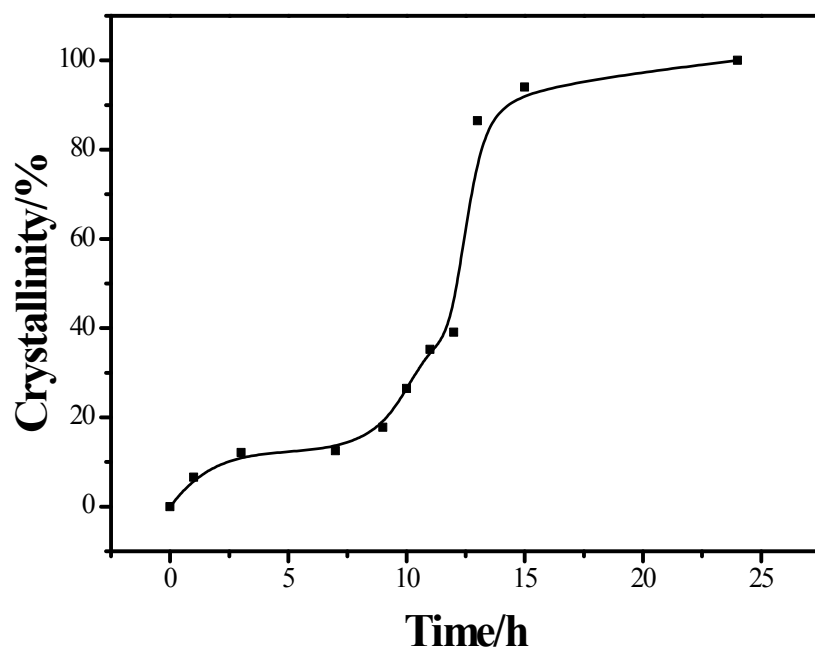

**Figure S1.** The dependence of S-AlPO<sub>4</sub>-11 crystallinity on the crystallization time.

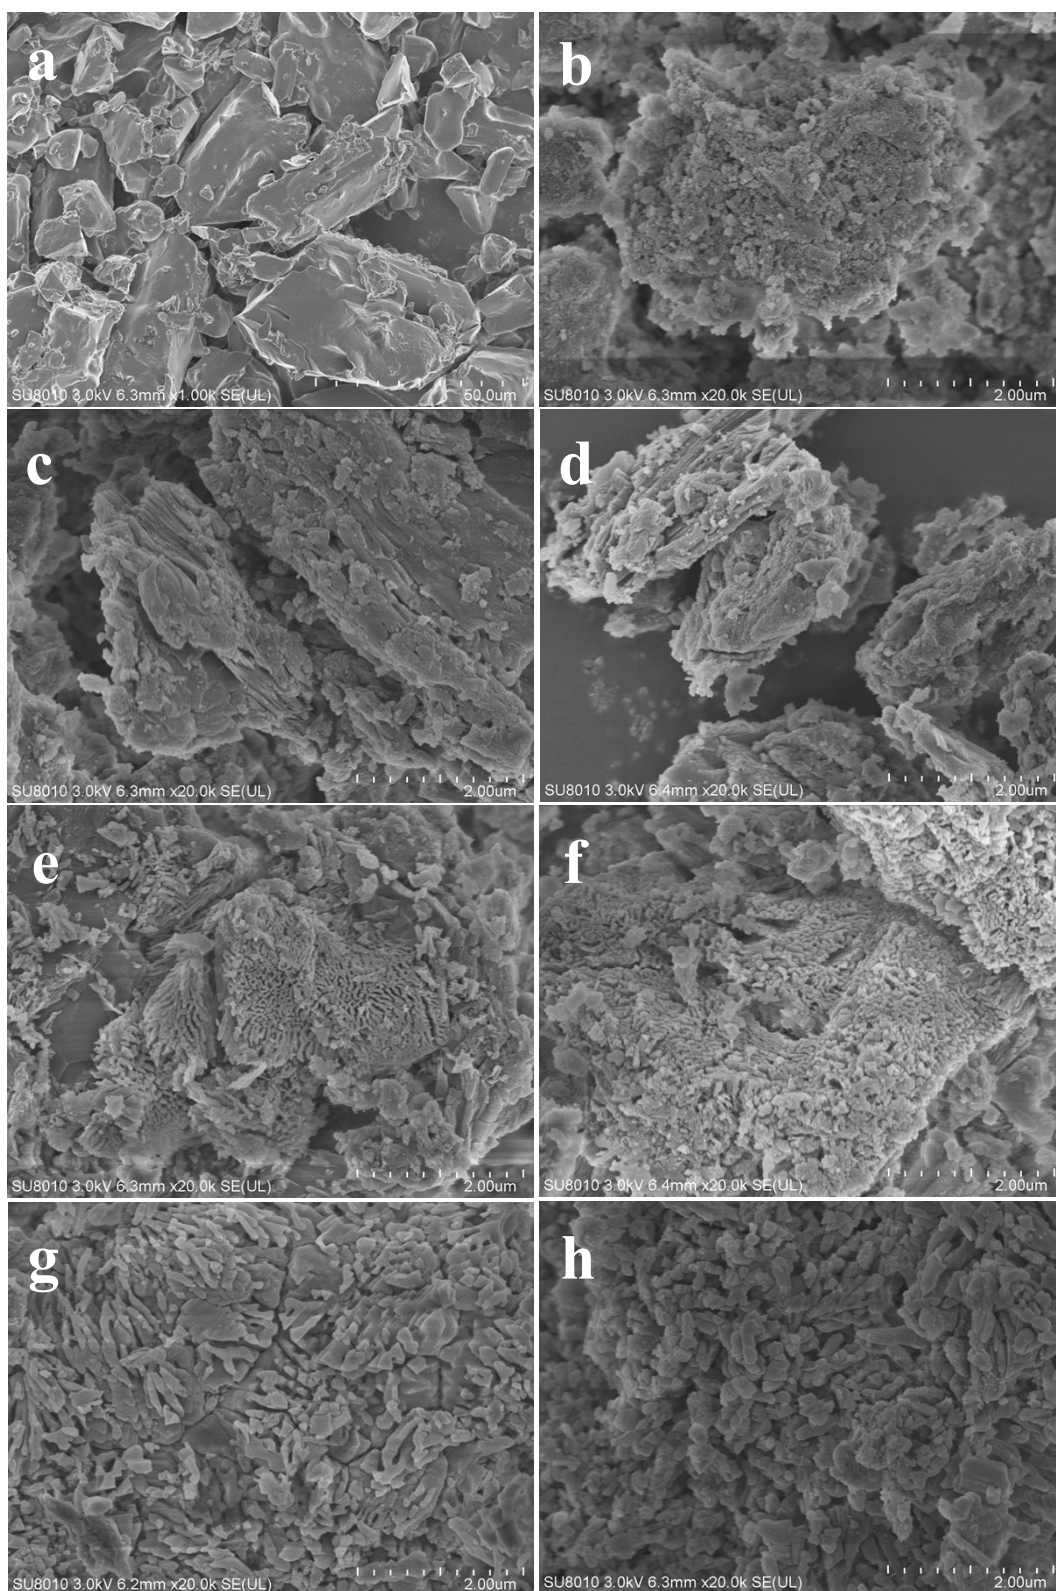

**Figure S2.** The SEM images of S-AlPO<sub>4</sub>-11 at crystallization time of (a) 0, (b) 1, (c) 3, (d) 7, (e) 9, (f) 10, (g) 13, and (h) 24 h, respectively.

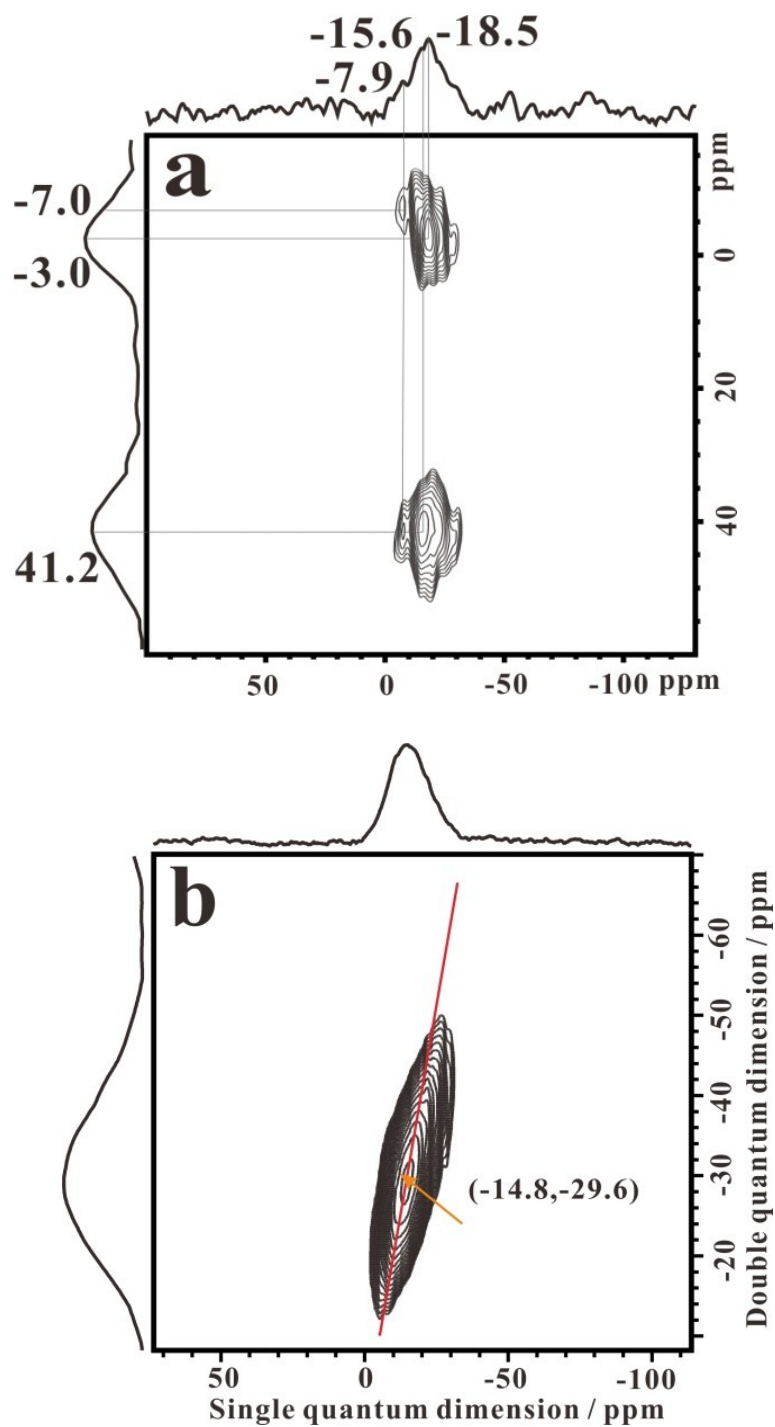

**Figure S3.** (a)  $^{31}\text{P}\{-^{27}\text{Al}\}$  PT-J-HMQC and (b)  $^{31}\text{P}\text{-}^{31}\text{P}$  2D DQ-SQ MAS NMR spectra of S-AlPO<sub>4</sub>-11 sample crystallization at 2 h.

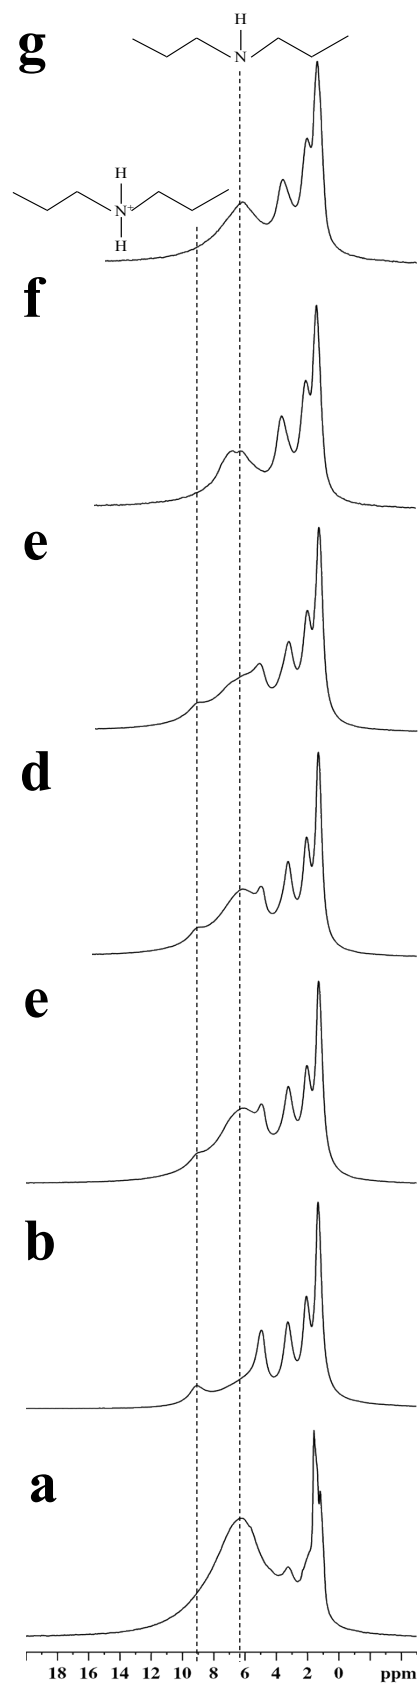

**Figure S4.**  $^1\text{H}$  MAS spectra of S-AlPO<sub>4</sub>-11 samples crystallized at (a) 1, (b) 3, (c) 7, (d) 9, (e) 11, (f) 15, and (h) 24 h, respectively.

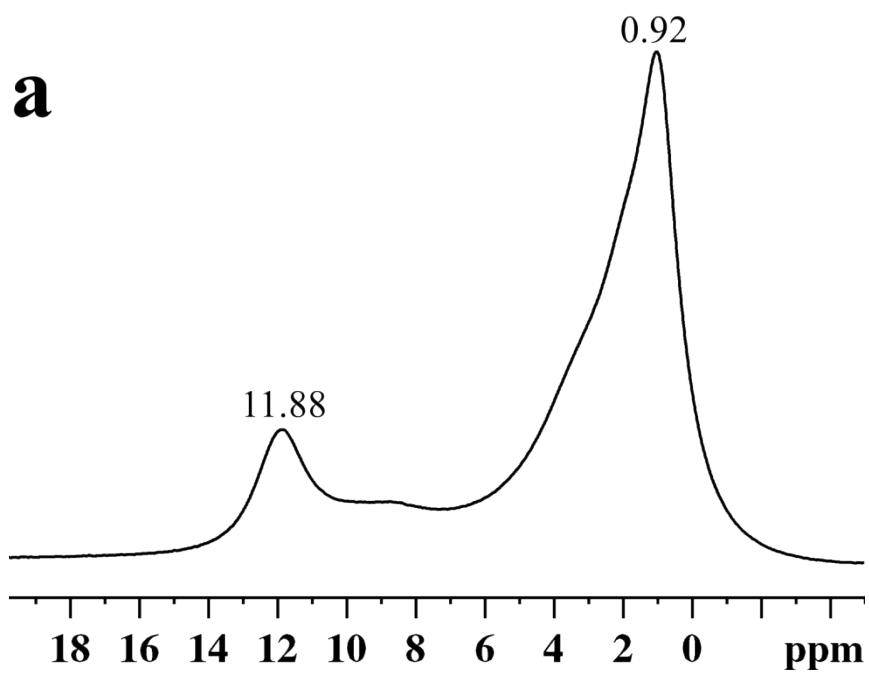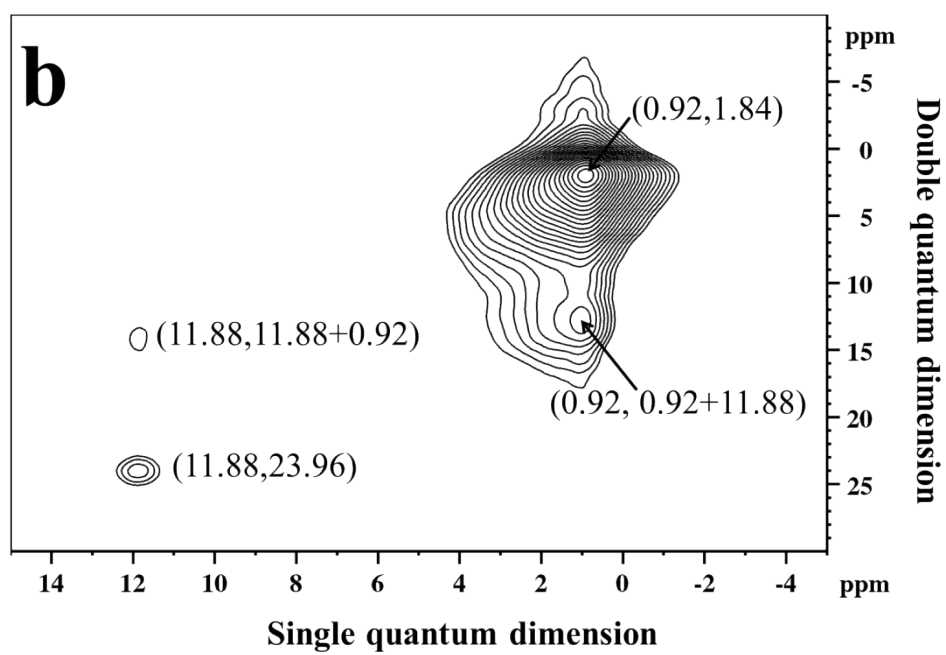

**Figure S5.** (a)  $^1\text{H}$  MAS and (b) 2D  $^1\text{H}$  DQ-SQ MAS spectra of  $\text{DPA}\cdot\text{H}_3\text{PO}_4$ .

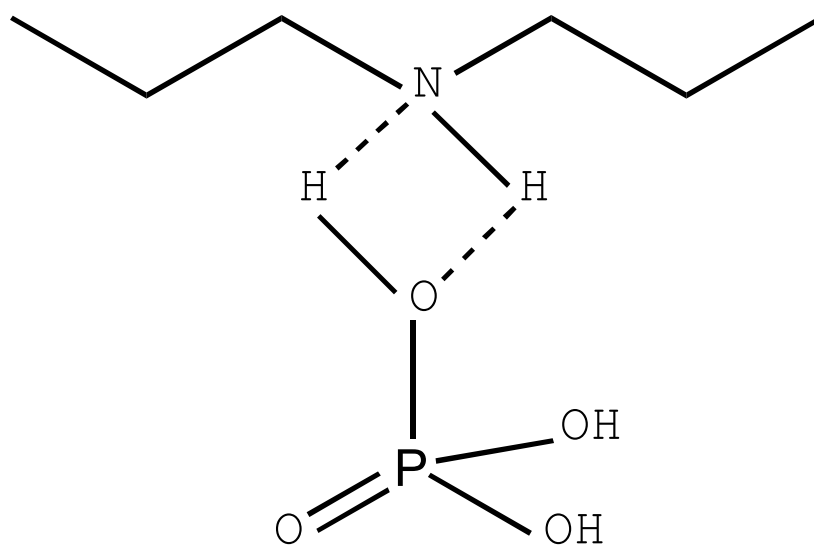

**Figure S6.** Schematic structure of DPA·H<sub>3</sub>PO<sub>4</sub>.



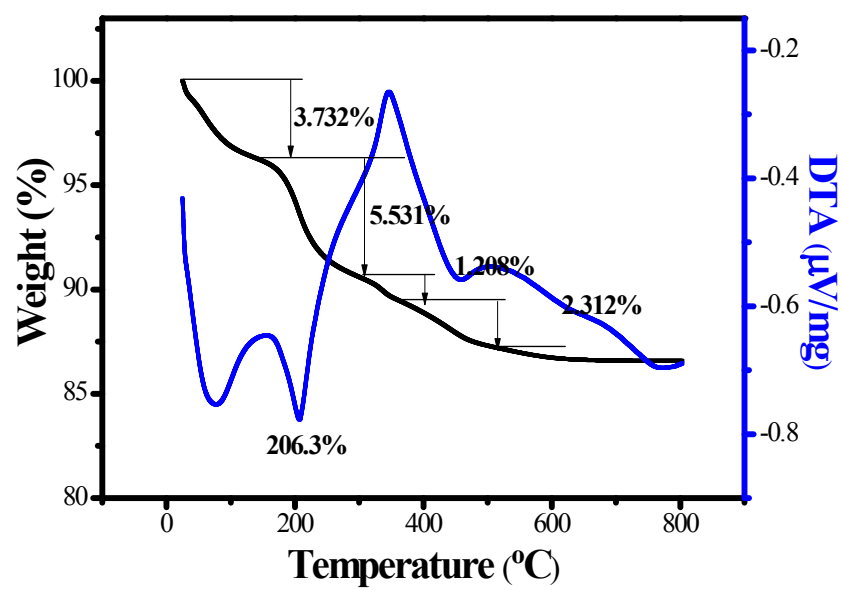

**Figure S7.** TG-DTA curves of S-AlPO<sub>4</sub>-11 sample crystallized at 24h.
